# Supplementary material for: FADS1-arachidonic acid axis enhances arachidonic acid metabolism by altering intestinal microecology in colorectal cancer
Source: Springer Nature journal article supplement (doi:10.1038/s41467-023-37590-x), 2023-04-11
Supplement: MOESM1 [file 41467_2023_37590_MOESM1_ESM.pdf]

1 **FADS1-arachidonic acid axis enhances arachidonic acid metabolism**  
 2 **by altering intestinal microecology in colorectal cancer**

3

4 **Supplementary figure and figure legends**

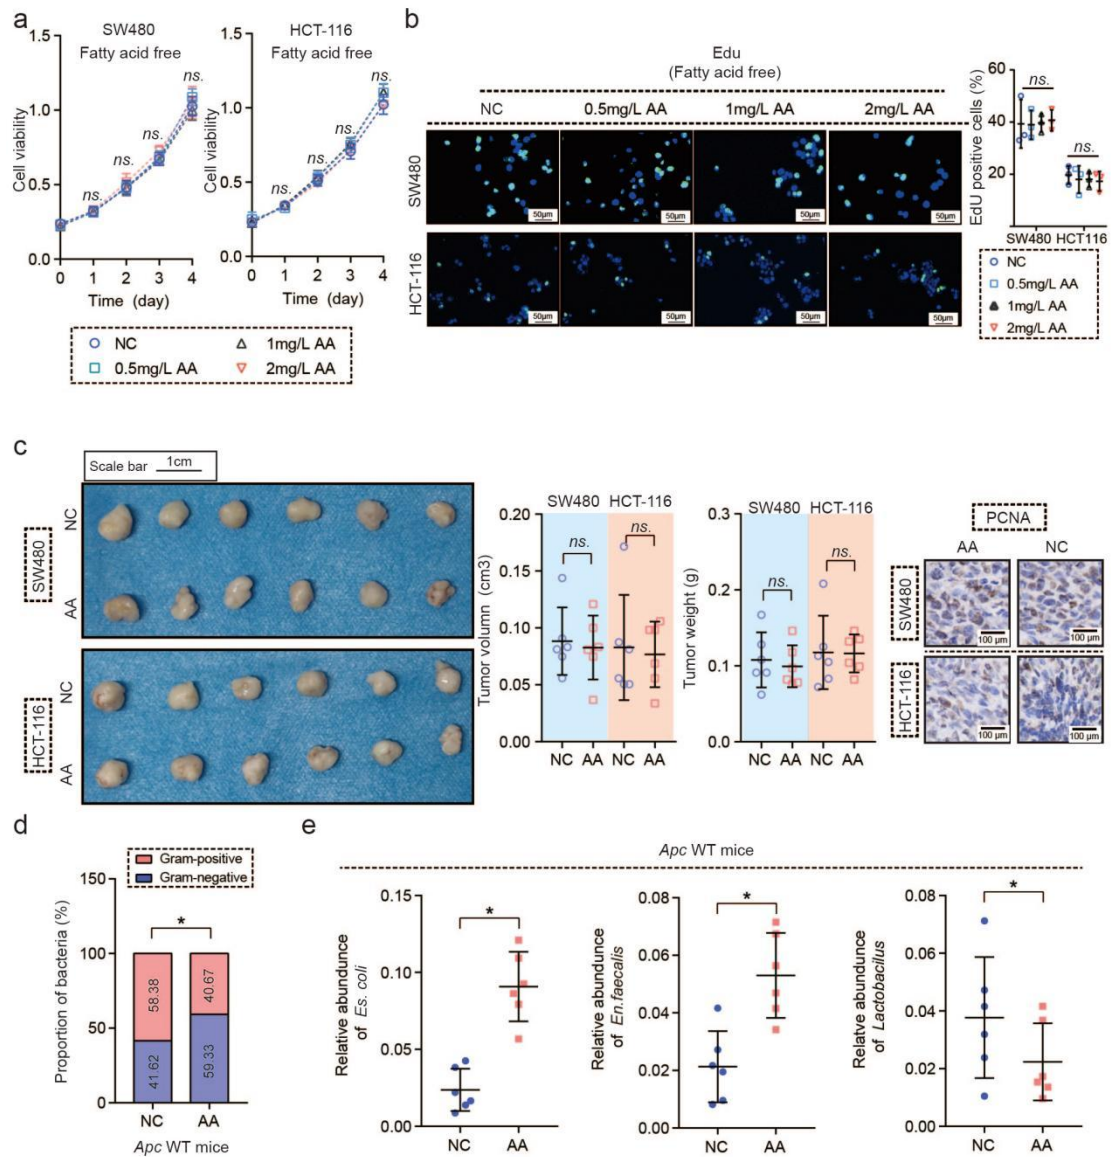

5

6 **Supplementary Fig 1. AA had no effect on cell proliferation *in***  
 7 ***vitro* and subcutaneous tumor.** a. The viability of SW480 and  
 8 HCT116 cells treated with different concentration (NC, 0.5mg/L,  
 9 1mg/L, 2mg/L) of AA, cultured with fatty acid free FBS, and

10 analyzed by CCK-8 (n=5 samples per group; means  $\pm$  s.d., one-way  
11 repeated-measures ANOVA, n=3 biological replicates). ns indicates no  
12 statistical significance. b. EdU assay for SW480 and HCT116 cells  
13 treated with different concentrations (NC, 0.5mg/L, 1mg/L, 2mg/L)  
14 of AA, cultured with fatty acid free FBS (n=5 samples per group, 3  
15 fields assessed per sample, means  $\pm$  s.d., two-tailed unpaired *t* test). ns  
16 indicates no statistical significance. Scale bars, 50  $\mu$ m. c.  
17 Representative image of the subcutaneous tumors and PCNA  
18 expression in tumor tissues with AA (2mg/L) treatment via  
19 intratumor injection in SW480 and HCT116 cells (n=6 mice per group,  
20 means  $\pm$  s.d., two-tailed unpaired *t* test). Tumor weight and volume  
21 (length\*width<sup>2</sup>/2) were calculated. ns indicates no statistical  
22 significance. Scale bars, 100  $\mu$ m. d. Ratio of gram-negative bacteria  
23 to gram-positive bacteria in the stool of *Apc* WT mice with NC and  
24 AA feeding (n=6 mice per group, *Chi* square test, n=3 technical  
25 replicates). \**p*=0.038. e. Relative abundance of *Es. coli*, *En. faecalis*  
26 and *Lactobacillus* in the stool of *Apc* WT mice with NC and AA  
27 feeding (n=6 mice per group, means  $\pm$  s.d., two-tailed unpaired *t* test,  
28 n=3 technical replicates). \**p*=0.047, 0.045, 0.039. Source data are  
29 provided in the Source Data file.

30

31

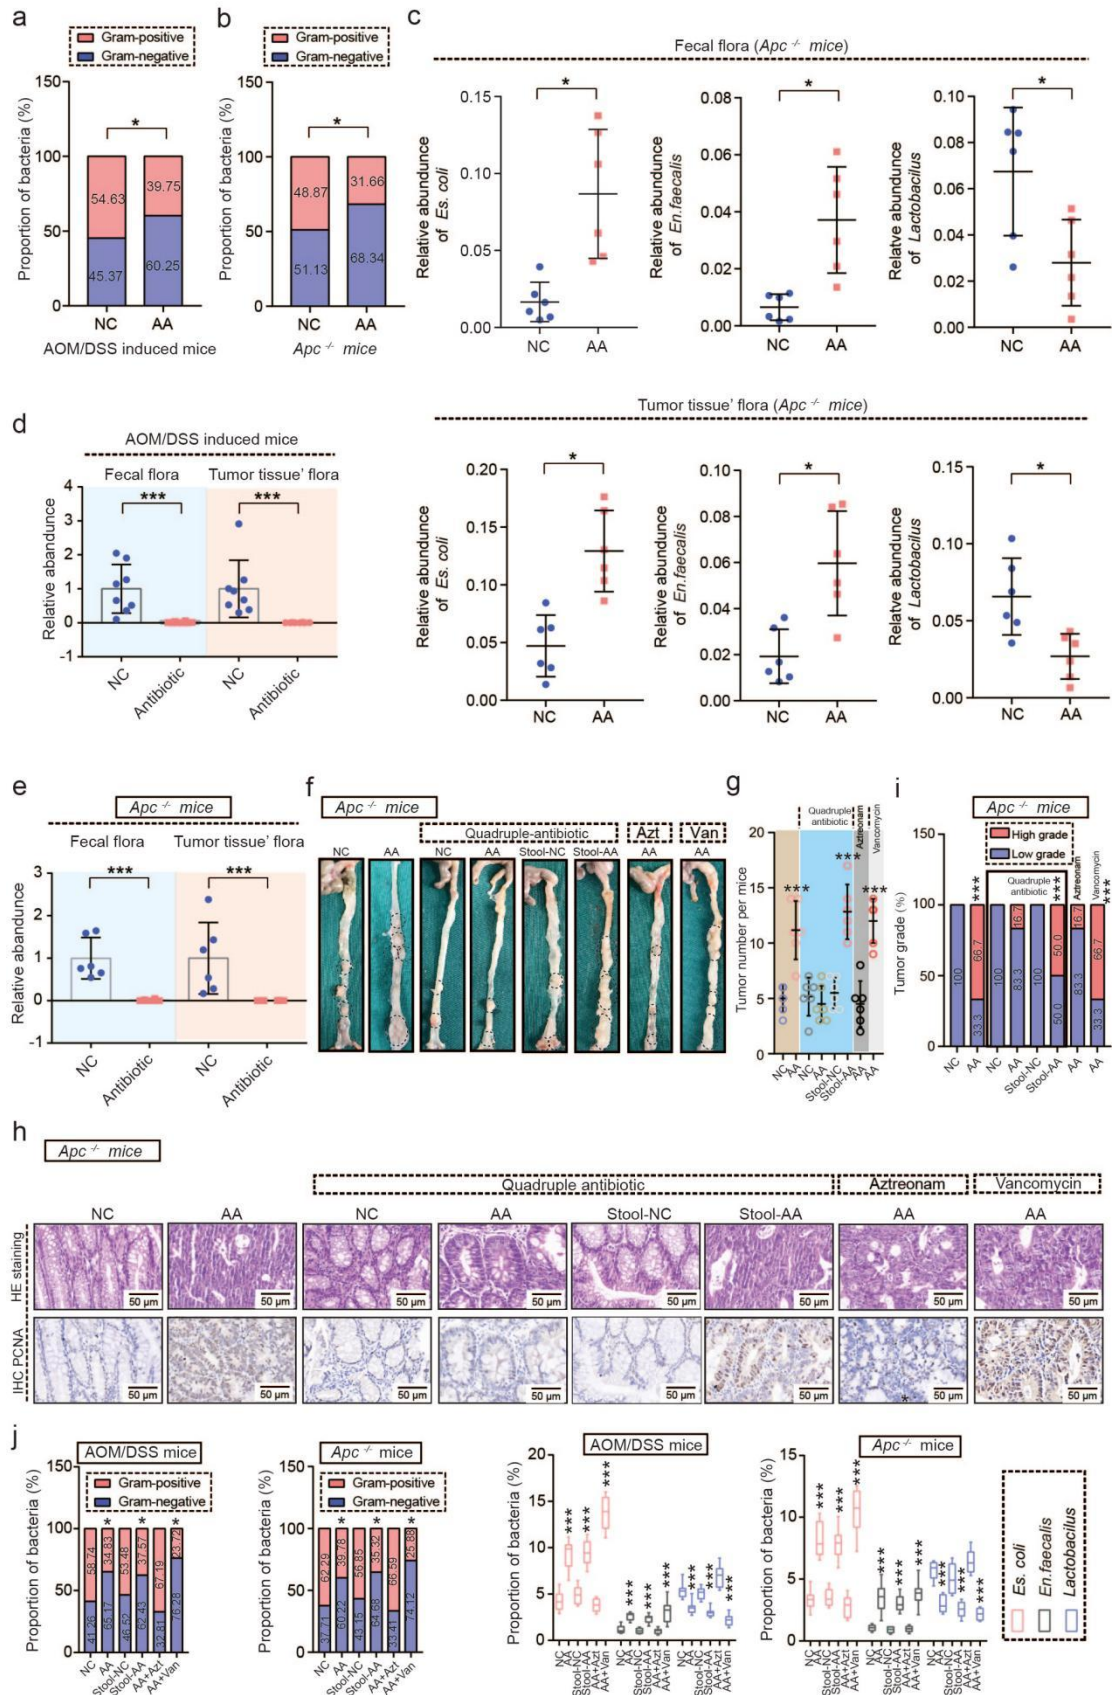

32

33

34 **Supplementary Fig 2. Gut microbes mediate the**

35 **tumor-promoting role of AA in CRC process.** a. Ratio of  
36 gram-negative bacteria and gram-positive bacteria in the stool of  
37 AOM/DSS induced mice with NC or AA feeding (n=6 mice per  
38 group, *Chi* square test, n=3 biological replicates). \* $p=0.034$ . b. Ratio  
39 of gram-negative bacteria and gram-positive bacteria in intestinal  
40 specific *Apc*<sup>-/-</sup> mice with NC or AA feeding (n=6 mice per group,  
41 *Chi* square test, n=3 biological replicates). \* $p=0.014$ . c. Relative  
42 abundance of *Es. coli*, *En. faecalis* and *Lactobacillus* in the stool and  
43 colon tissue of intestine-specific *Apc*<sup>-/-</sup> mice with NC and AA feeding  
44 (n=6 mice per group, means  $\pm$  s.d., two-tailed unpaired *t* test, n=3  
45 biological replicates). \* $p=0.016$ , 0.037, 0.048. d. Gut microbial  
46 elimination in AOM/DSS induced mice (n=6 mice per group, means  
47  $\pm$  s.d., two-tailed unpaired *t* test, n=3 biological replicates). \*\*\* $p <$   
48 0.001. e. Gut microbial elimination in intestine-specific *Apc*<sup>-/-</sup> mice  
49 (n=6 mice per group, means  $\pm$  s.d., two-tailed unpaired *t* test, n=3  
50 biological replicates). \*\*\* $p <$  0.001. f. Tumor images of the  
51 intestine-specific *Apc*<sup>-/-</sup> mice with NC or AA feeding under different  
52 antibiotics treatment (Quadruple-antibiotics, 0.2g/L of aztreonam,  
53 0.1g/L of vancomycin) (n=6 mice per group). Black circles showed  
54 tumor region. g. Tumor number of the intestine-specific *Apc*<sup>-/-</sup> mice  
55 with NC or AA feeding under different antibiotics treatment (n=6  
56 mice per group, means  $\pm$  s.d., two-tailed unpaired *t* test). \*\*\* $p <$

57 0.001 (compared with NC group). h. HE staining and PCNA  
58 expression in the tumor tissue of the intestine-specific *Apc*<sup>-/-</sup> mice  
59 with NC or AA feeding under different antibiotics treatment (n=6  
60 mice per group). Scale bars, 50 μm. i. Tumor grades of the  
61 intestine-specific *Apc*<sup>-/-</sup> mice with NC or AA feeding under different  
62 antibiotics treatment (n=6 mice per group, 3 fields assessed per  
63 sample, *Chi* square test). \*\*\**p* < 0.001 (compared with NC group). j.  
64 Gut microbes alteration in AOM/DSS and intestine-specific *Apc*<sup>-/-</sup>  
65 mice with the fecal transplantation and different antibiotics (n=6  
66 mice per group, *Chi* square test, Box plots: Min to Max; n=3  
67 biological replicates). \**p* = 0.001, 0.003, <0.001, 0.002, 0.001,  
68 <0.001, \*\*\**p* < 0.001 (compared with NC group). Source data are  
69 provided in the Source Data file.

70

71

72

73

74

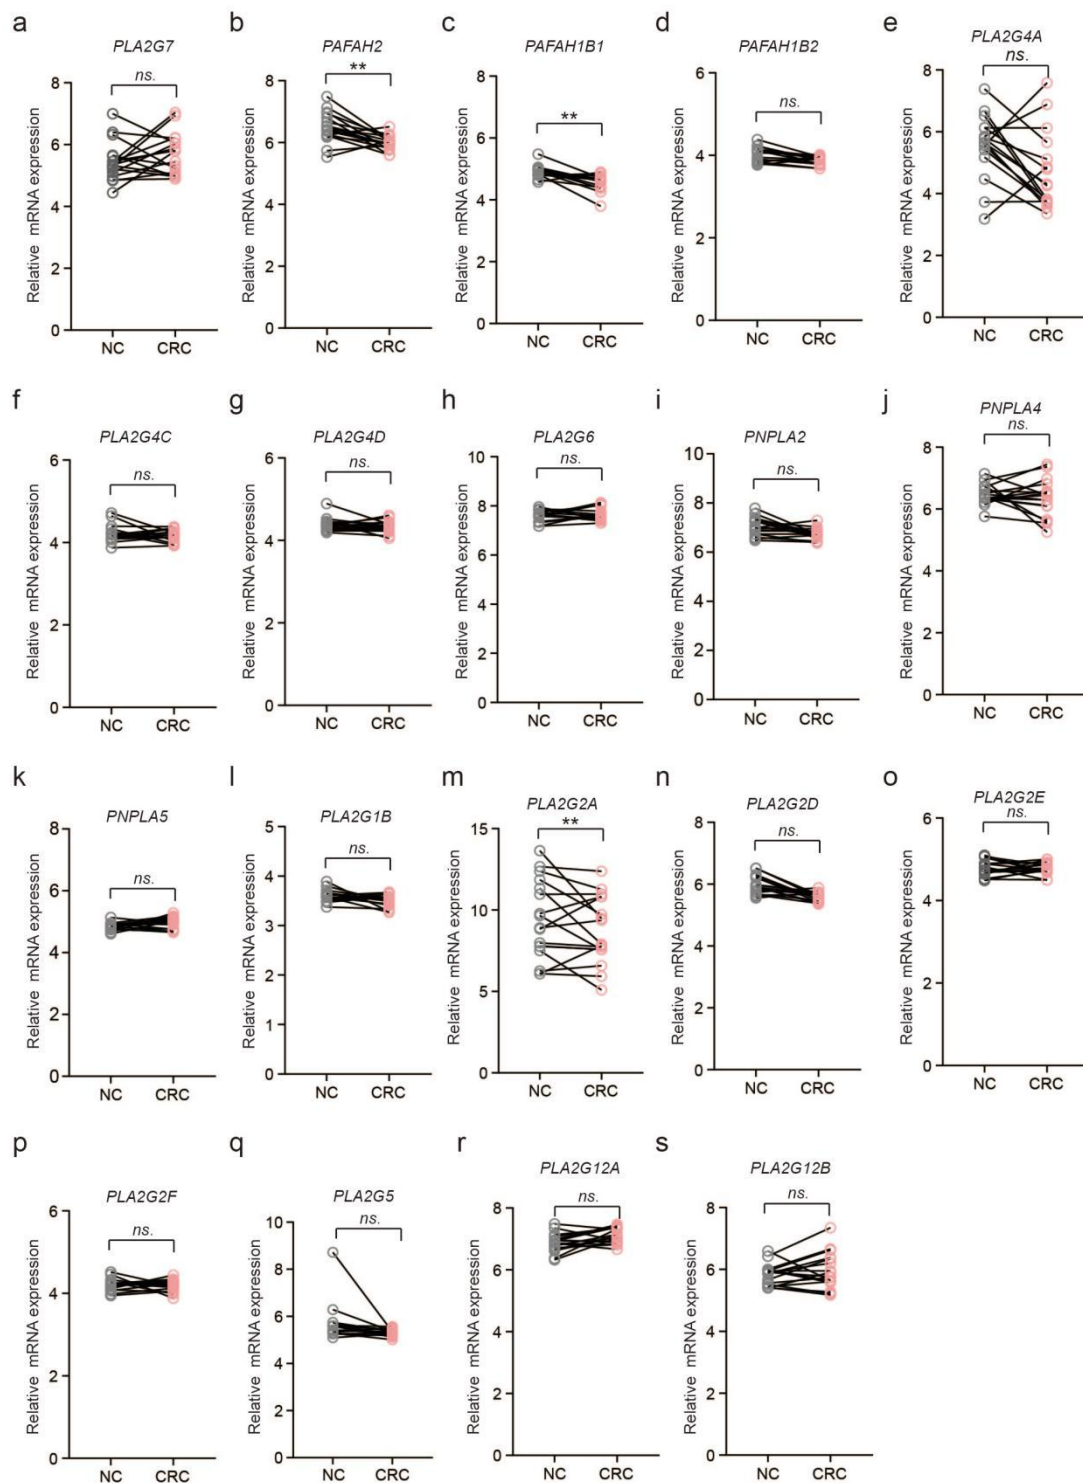

75 **Supplementary Fig 3. The mRNA expression of PLA enzymes in**  
 76 **GDS4382. (a-s) The mRNA expression of *PLA2G7*, *PFAFH2*,**  
 77 ***PFAFH1B1*, *PFAFH1B2*, *PLA2G4A*, *PLA2G4C*, *PLA2G4D*, *PLA2G6*,**

78 *PNPLA2, PNPLA4, PNPLA5, PLA2G1B, PLA2G2A, PLA2G2D,*  
79 *PLA2G2E, PLA2G2F, PLA2G5, PLA2G12A, PLA2G12B* in 17 cases  
80 of paired NC and CRC samples. Measurement data were presented  
81 as the mean  $\pm$  s.d.. The two-tailed paired student's *t*-test was used for  
82 statistical analysis. **\*\****p=0.002, 0.003, 0.008*, ns represents no  
83 statistical significance. Source data are provided in the Source Data file.

84

85

86

87

88

89

90

91

92

93

94

95

96

97

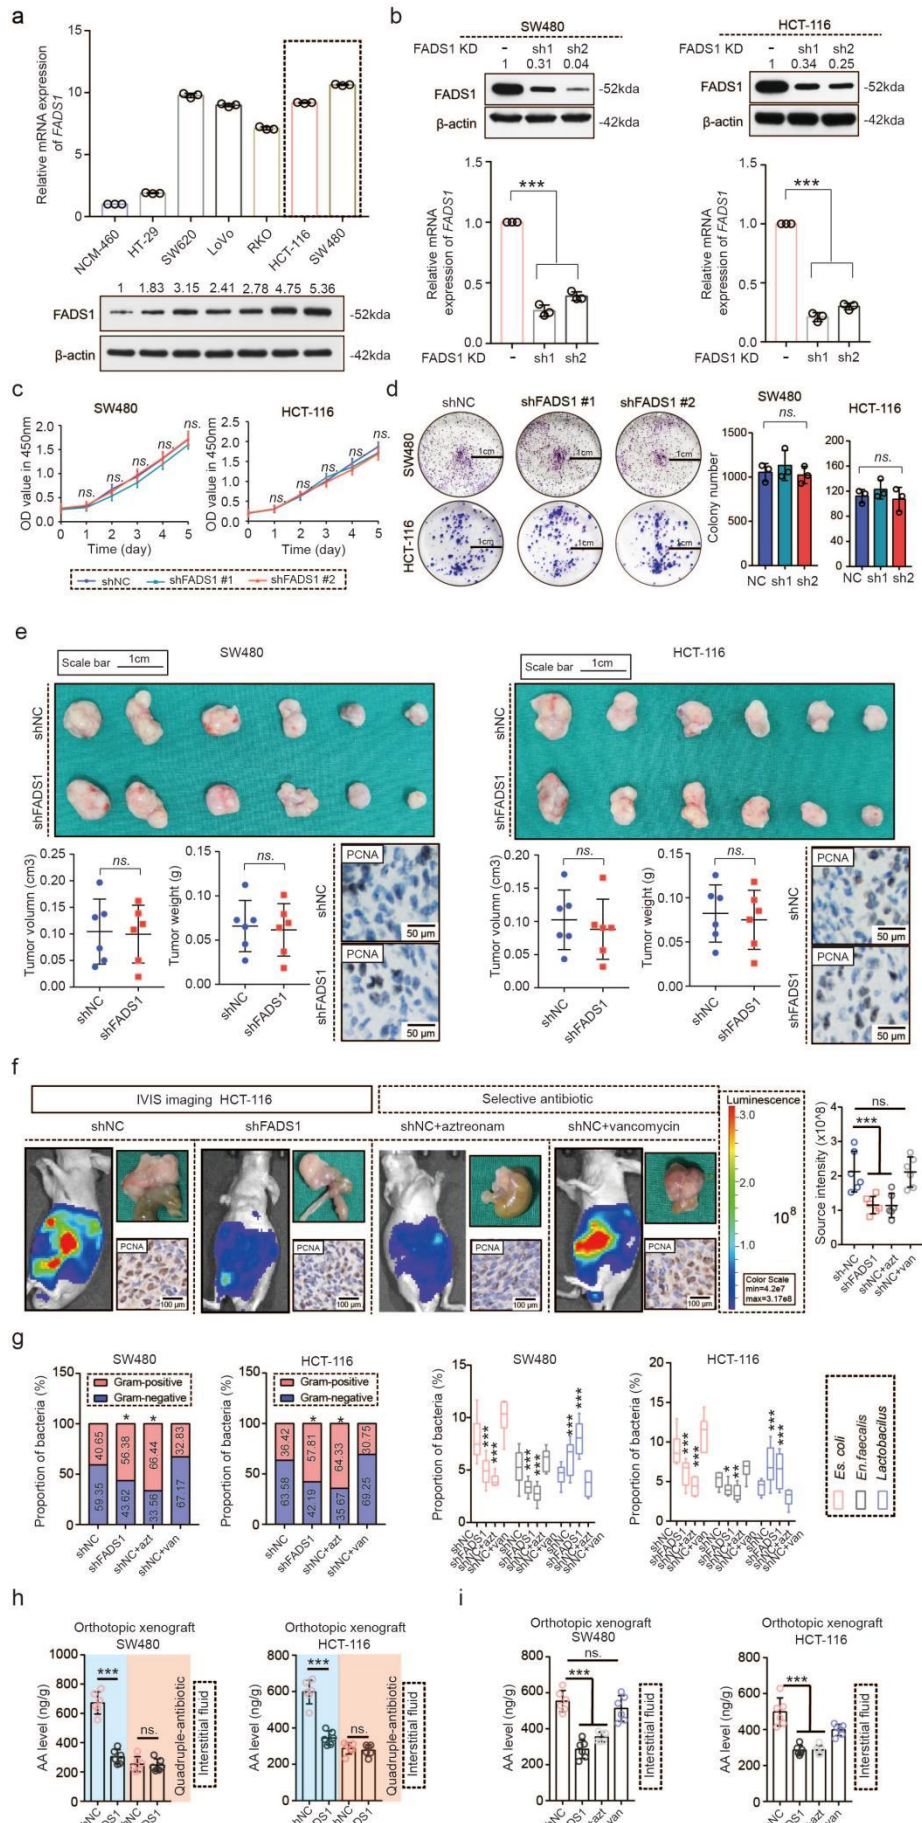

99 **Supplementary Fig 4. FADS1 knockdown did not affect the**  
100 **proliferation of CRC cells.** a. The expression of FADS1 in colonic  
101 epithelial and CRC cell lines. The expression of FADS1 was  
102 detected by q-PCR and western blot (n=6 mice per group, means  $\pm$   
103 s.d., n=3 biological replicates). b. *FADS1* knockdown in SW480 and  
104 HCT116 cells by shRNAs. The efficiency of *FADS1* knockdown was  
105 detected (n=6 mice per group, means  $\pm$  s.d., two-tailed unpaired *t*  
106 test, n=3 biological replicates). \*\*\**p* < 0.001. c. The viability of  
107 SW480 and HCT116 cells transfected with sh*FADS1* or shNC (n=5  
108 samples per group; means  $\pm$  s.d., one-way repeated-measures  
109 ANOVA, n=3 biological replicates). ns represents no statistical  
110 significance. d. Colony formation ability of SW480 and HCT116  
111 cells transfected with sh*FADS1* or shNC (n=3 per group, means  $\pm$   
112 s.d., two-tailed unpaired *t* test, n=3 biological replicates). ns  
113 represents no statistical significance. e. The subcutaneous tumors  
114 and PCNA expression in the tumor tissues injected with shNC and  
115 sh*FADS1* SW480 or HCT116 cells (n=6 mice per group, means  $\pm$   
116 s.d., two-tailed unpaired *t* test). ns represents no statistical  
117 significance. Scale bars, 50  $\mu$ m. f. IVIS imaging of the orthotopic  
118 tumor injected by shNC and sh*FADS1* HCT116<sup>Luc</sup> cells (n=6 mice  
119 per group, means  $\pm$  s.d., two-tailed unpaired *t* test), gut microbes  
120 were deleted by aztreonam or vancomycin treatment. Scale colour

121 bar:  $4.20 \times 10^7$ - $3.17 \times 10^8$ . \*\*\* $p < 0.001$ . ns represents no statistical  
122 significance. g. Ratio of gram-negative and gram-positive bacteria in  
123 the orthotopic tumors in shNC, sh*FADSI*, shNC+aztreonam,  
124 shNC+vancomycin groups (n=6 mice per group, *Chi* square test,  
125 Box plots: Min to Max; n=3 biological replicates). \* $p=0.034$ , 0.001,  
126 0.002, <0.001, 0.017, \*\* $p=0.006$ , \*\*\* $p<0.001$  (compared with  
127 shNC). h. AA levels in the interstitial fluid of shNC, sh*FADSI*,  
128 shNC+quadruple-antibiotic and sh*FADSI*+quadruple-antibiotic  
129 orthotopic tumors (n=6 mice per group, means  $\pm$  s.d., two-tailed  
130 unpaired *t* test, n=3 technical replicates). \*\*\* $p<0.001$ . ns represents  
131 no statistical significance. i. AA levels in the interstitial fluid of  
132 shNC, sh*FADSI*, shNC+aztreonam, shNC+vancomycin orthotopic  
133 tumors (n=6 mice per group, means  $\pm$  s.d., two-tailed unpaired *t* test,  
134 n=3 technical replicates). \*\*\* $p<0.001$ . ns represents no statistical  
135 significance. Source data are provided in the Source Data file.

136

137

138

139

140

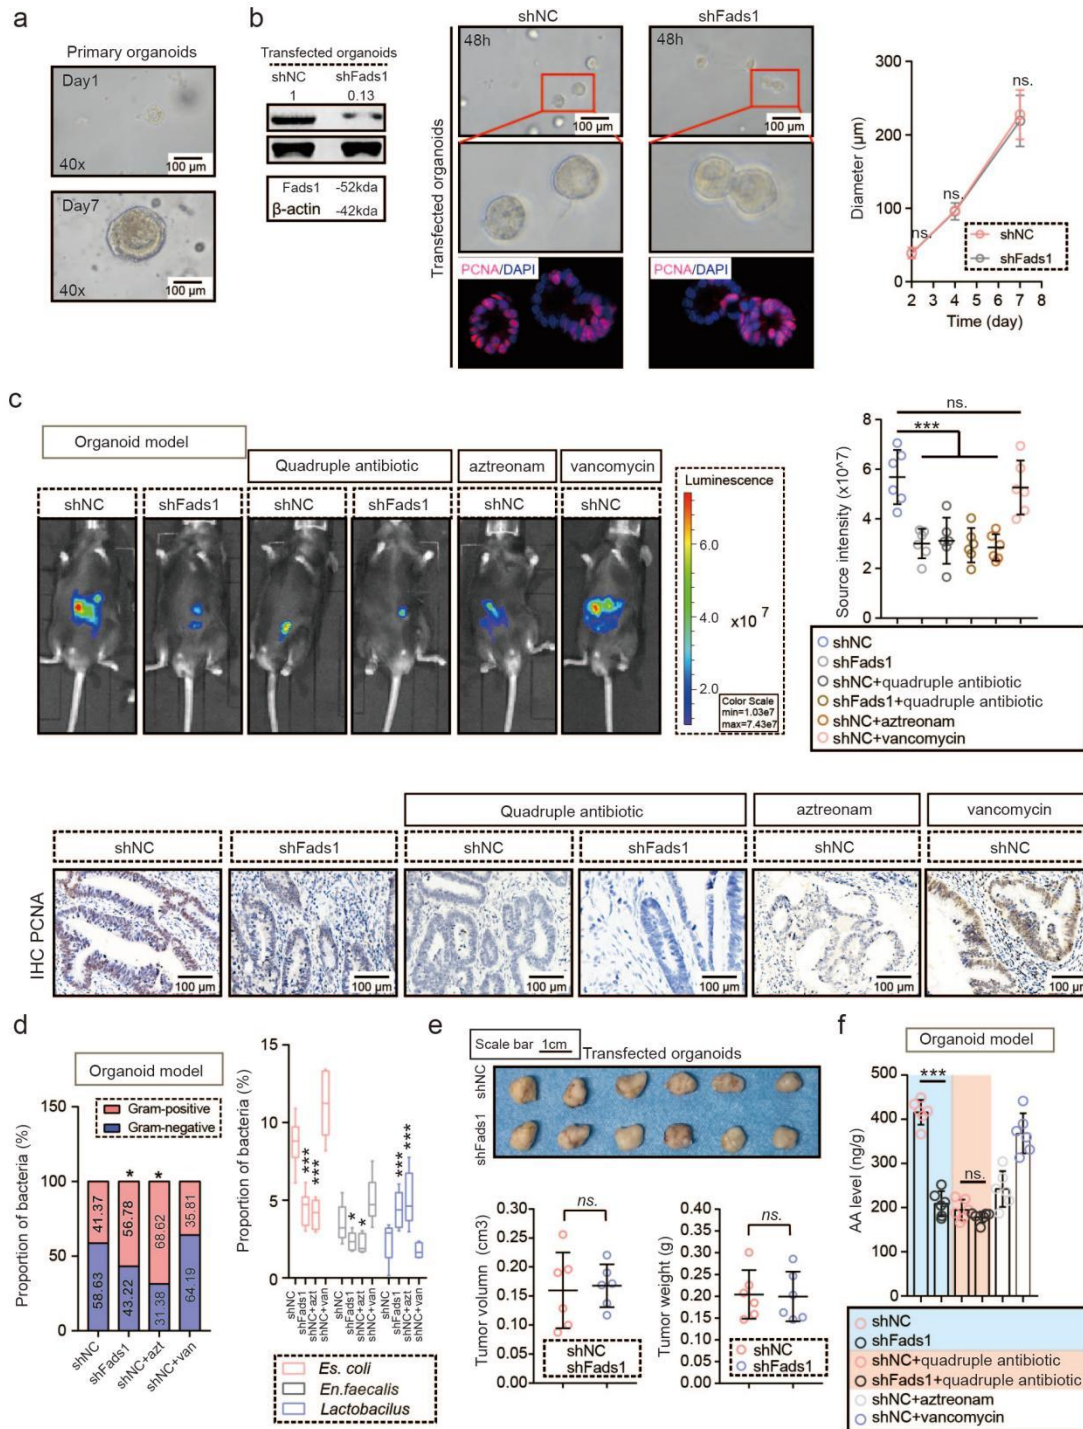

141

142 **Supplementary Fig 5. The tumor-promoting role of FADS1 in**

143 **CRC organoid model.** a. Establishment of CRC organoid model by

144 AOM/DSS induced mice. Scale bars, 100  $\mu$ m. b. Transfected

145 organoids with shNC and shFads1 by shRNAs. The efficiency of

146 Fads1 knockdown was detected by western blot (n=3 biological

147 replicates). Scale bars, 100  $\mu\text{m}$ . The diameter of the organoid was  
148 detected at the different time point (2 day, 4 day, 7 day) (n=5  
149 samples per group, 3 fields assessed per sample, means  $\pm$  s.d.,  
150 two-tailed unpaired *t* test, n=3 biological replicates). ns represents no  
151 statistical significance. c. IVIS imaging of the orthotopic tumor  
152 injected by shNC and sh*Fads1* organoid cells under different  
153 antibiotics treatment (Quadruple-antibiotics, 0.2g/L of aztreonam,  
154 0.1g/L of vancomycin) (n=6 mice per group, means  $\pm$  s.d., two-tailed  
155 unpaired *t* test). Luminescence was analyzed and representative  
156 images of PCNA expression in shNC and sh*Fads1* organoid tissues.  
157 \*\*\**p*<0.001. ns represents no statistical significance. Scale bars,  
158 100  $\mu\text{m}$ . d. Ratio of gram-negative and gram-positive bacteria in the  
159 orthotopic tumors of shNC, sh*Fads1*, shNC+aztreonam,  
160 shNC+vancomycin groups (n=6 mice per group, *Chi* square test,  
161 Box plots: Min to Max; n=3 biological replicates). \**p*=0.024, <0.001,  
162 0.035, 0.018, \*\*\**p*<0.001 (compared with shNC). e. Representative  
163 image of the subcutaneous tumors injected by shNC and sh*Fads1*  
164 organoid cells (n=6 mice per group, means  $\pm$  s.d., two-tailed  
165 unpaired *t* test, ). Tumor weight and volume (length\*width<sup>2</sup>/2) were  
166 calculated. ns represents no statistical significance. f. AA levels in  
167 the interstitial fluid of shNC, sh*Fads1*, shNC+quadruple-antibiotic,  
168 sh*Fads1*+quadruple-antibiotic, shNC+aztreonam, shNC+vancomycin

169 orthotopic tumors (n=6 mice per group, means  $\pm$  s.d., two-tailed  
170 unpaired *t* test, n=3 technical replicates). \*\*\**p*<0.001. ns represents  
171 no statistical significance. Source data are provided in the Source  
172 Data file.

173

174

175

176

177

178

179

180

181

182

183

184

185

186

187

188

189

190

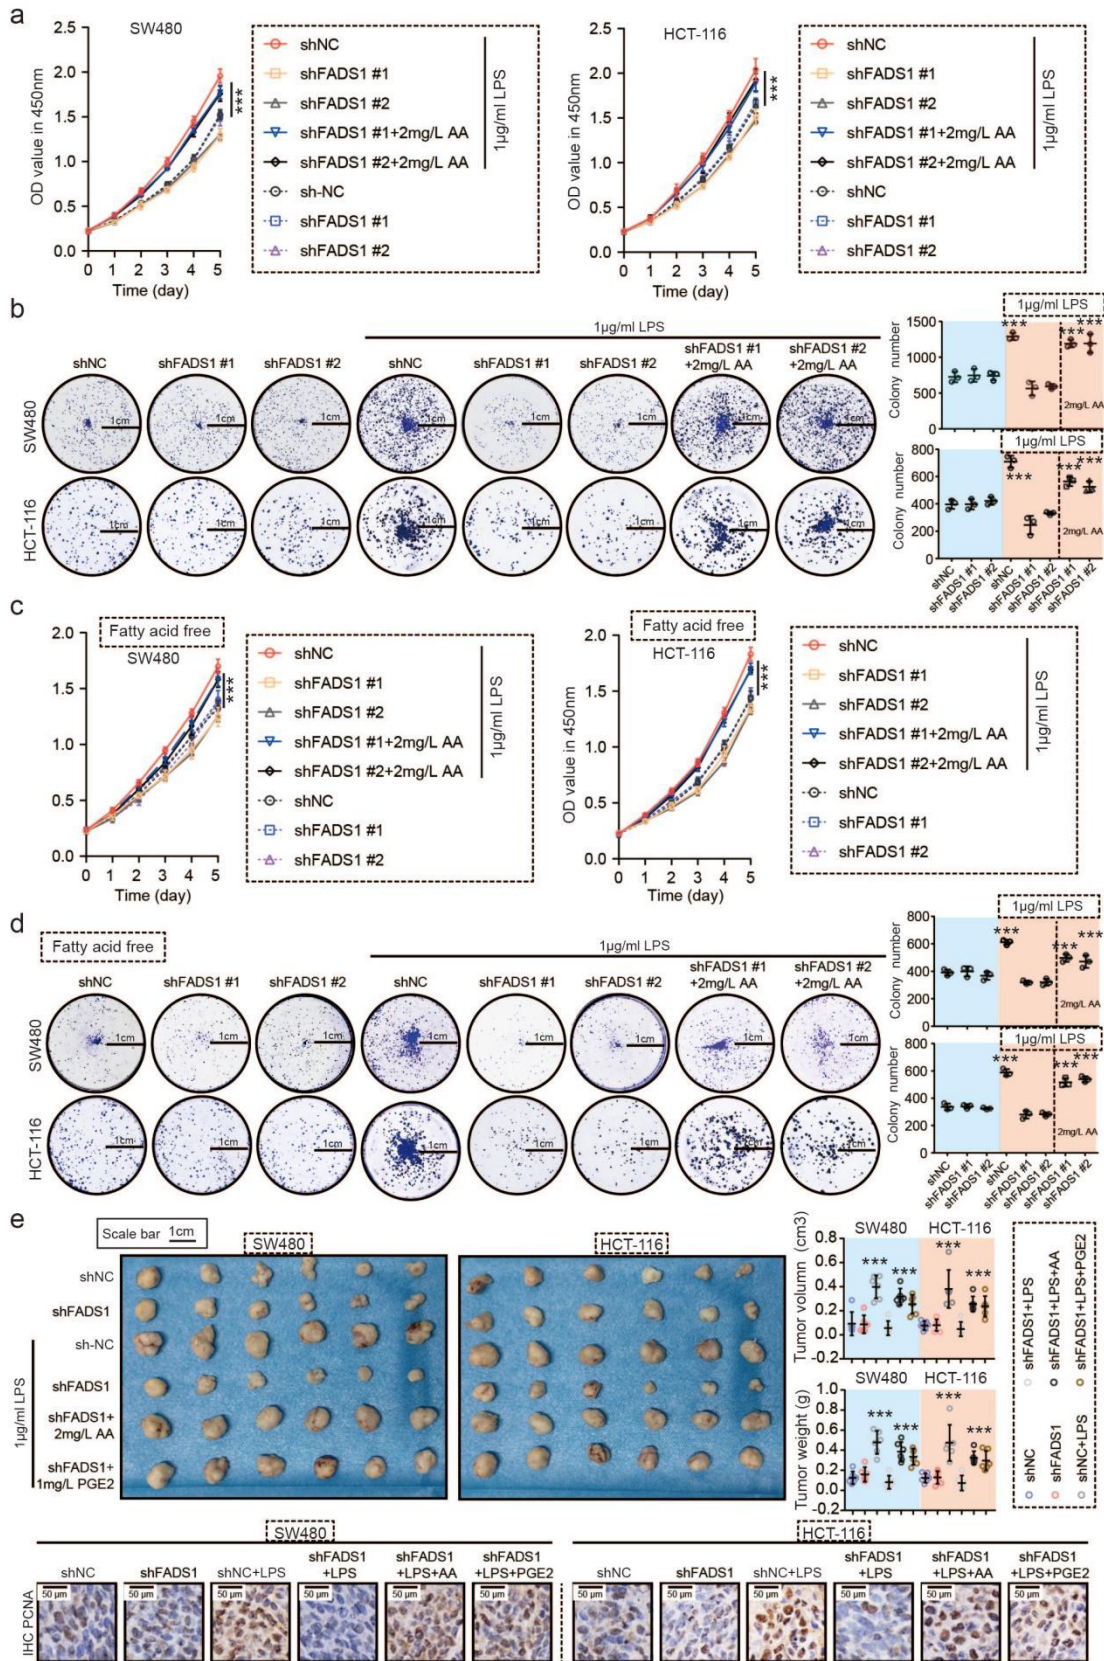

194 **Supplementary Fig 6. FADS1 knockdown decreased the CRC**  
195 **cell proliferation upon LPS activation.** a. The viability of SW480  
196 and HCT116 cells transfected with *shFADS1* or *shNC*, under  
197 activation of 1 $\mu$ g/ml of LPS and 2mg/L of AA treatment, as analyzed  
198 with CCK-8 assay (n=5 samples per group; means  $\pm$  s.d., one-way  
199 repeated-measures ANOVA, n=3 biological replicate). \*\*\* $p$ <0.001.  
200 b. Colony formation ability of SW480 and HCT116 cells transfected  
201 with *shFADS1* or *shNC*, under activation of 1 $\mu$ g/ml of LPS and  
202 2mg/L of AA treatment, as analyzed with colony formation assay  
203 (n=3 per group, means  $\pm$  s.d., two-tailed unpaired *t* test, n=3  
204 biological replicates). \*\*\* $p$ <0.001 (compared with *shNC* group). c.  
205 The viability of SW480 and HCT116 cells transfected with *shFADS1*  
206 or *shNC*, under activation of 1 $\mu$ g/ml of LPS and 2mg/L of AA  
207 treatment, cultured with fatty acid free FBS (n=5 samples per group;  
208 means  $\pm$  s.d., one-way repeated-measures ANOVA, n=3 biological  
209 replicate). \*\*\* $p$ <0.001. d. Colony formation ability of SW480 and  
210 HCT116 cells transfected with *shFADS1* or *shNC*, under activation  
211 of 1 $\mu$ g/ml of LPS and 2mg/L of AA treatment, cultured with fatty  
212 acid free FBS (n=3 per group, means  $\pm$  s.d., two-tailed unpaired *t*  
213 test, n=3 biological replicates). \*\*\* $p$ <0.001(compared with *shNC*  
214 group). Scale bars, 1cm. e. Representative image of the  
215 subcutaneous tumors injected with *shNC* and *shFADS1* SW480 or

216 HCT116 cells, under activation of 1 $\mu$ g/ml of LPS and 2mg/L of AA  
217 or 1mg/L of PGE2 treatment by intratumoral injection (n=6 mice per  
218 group, means  $\pm$  s.d., two-tailed unpaired *t* test). Tumor weight and  
219 volume (length\*width<sup>2</sup>/2) were calculated. \*\*\**p*<0.001 (compared  
220 with shNC group). Representative images of PCNA expression in  
221 the subcutaneous tumors was showed. Scale bars, 50  $\mu$ m. Source  
222 data are provided in the Source Data file.

223

224

225

226

227

228

229

230

231

232

233

234

235

236

237

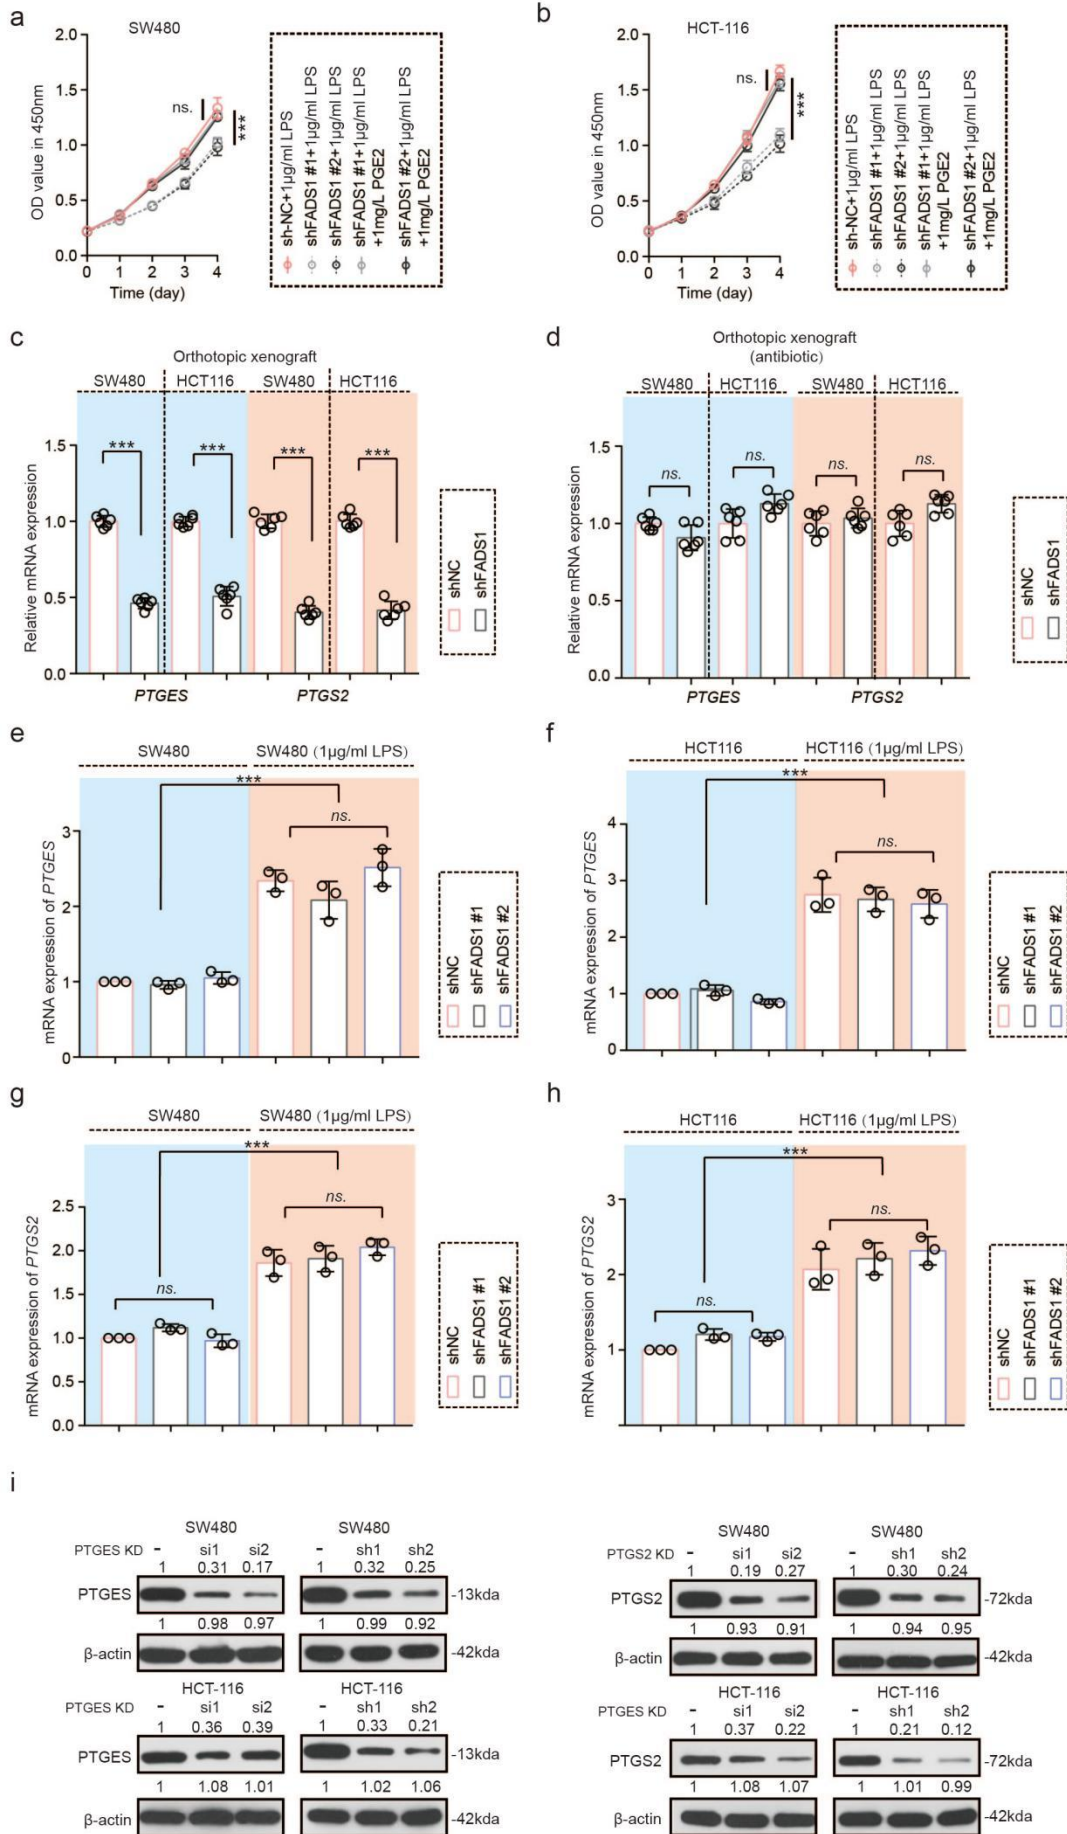

239 **Supplementary Fig 7. LPS activation promotes the mRNA**  
240 **expression of *PTGES* and *PTGS2*.** a. The viability of SW480 cells  
241 transfected with *shFADS1* or *shNC*, under activation of 1 $\mu$ g/ml of  
242 LPS and 1mg/L of PGE2 treatment (n=5 samples per group; means  $\pm$   
243 s.d., one-way repeated-measures ANOVA, n=3 biological replicate).  
244 \*\*\* $p$ <0.001. ns represents no statistical significance. b. The viability  
245 of HCT116 cells transfected with *shFADS1* or *shNC*, under  
246 activation of 1 $\mu$ g/ml of LPS and 1mg/L of PGE2 treatment (n=5  
247 samples per group; means  $\pm$  s.d., one-way repeated-measures  
248 ANOVA, n=3 biological replicate). \*\*\* $p$ <0.001. ns represents no  
249 statistical significance. c. The mRNA expressions of *PTGES* and  
250 *PTGS2* in the tumor tissues of the orthotopic model injected with  
251 SW480 and HCT116 cells transfected with *shFADS1* or *shNC* (n=6  
252 samples per group, means  $\pm$  s.d., two-tailed unpaired  $t$  test, n=3  
253 technical replicates). \*\*\* $p$ <0.001. d. The mRNA expressions of  
254 *PTGES* and *PTGS2* in the orthotopic tumor injected by SW480 and  
255 HCT116 cells transfected with *shFADS1* or *shNC* (n=6 samples per  
256 group, means  $\pm$  s.d., two-tailed unpaired  $t$  test, n=3 technical  
257 replicates), gut microbes were deleted by antibiotic treatment. ns  
258 represents no statistical significance. e and f. The mRNA expression  
259 of *PTGES* in SW480 cells transfected with *shFADS1* or *shNC*, with  
260 or without activation of 1 $\mu$ g/ml of LPS (n=3 samples per group,

261 means  $\pm$  s.d., two-tailed unpaired *t* test, n=3 biological replicates).  
262 \*\*\**p*<0.001. ns represents no statistical significance. g. The mRNA  
263 expression of *PTGS2* in SW480 cells transfected with sh*FADS1* or  
264 shNC, with or without activation of 1 $\mu$ g/ml of LPS (n=3 samples per  
265 group, means  $\pm$  s.d., two-tailed unpaired *t* test, n=3 biological  
266 replicates). \*\*\**p*<0.001. ns represents no statistical significance. h.  
267 The mRNA expression of *PTGS2* in HCT116 cells transfected with  
268 sh*FADS1* or shNC, with or without activation of 1 $\mu$ g/ml LPS (n=3  
269 samples per group, means  $\pm$  s.d., two-tailed unpaired *t* test, n=3  
270 biological replicates). \*\*\**p*<0.001. ns represents no statistical  
271 significance. i. *PTGES* and *PTGS2* knockdown in SW480 and  
272 HCT116 cells by siRNAs and shRNAs, detected by western blot  
273 (n=3 biological replicates). Source data are provided in the Source  
274 Data file.

275

276

277

278

279

280

281

282

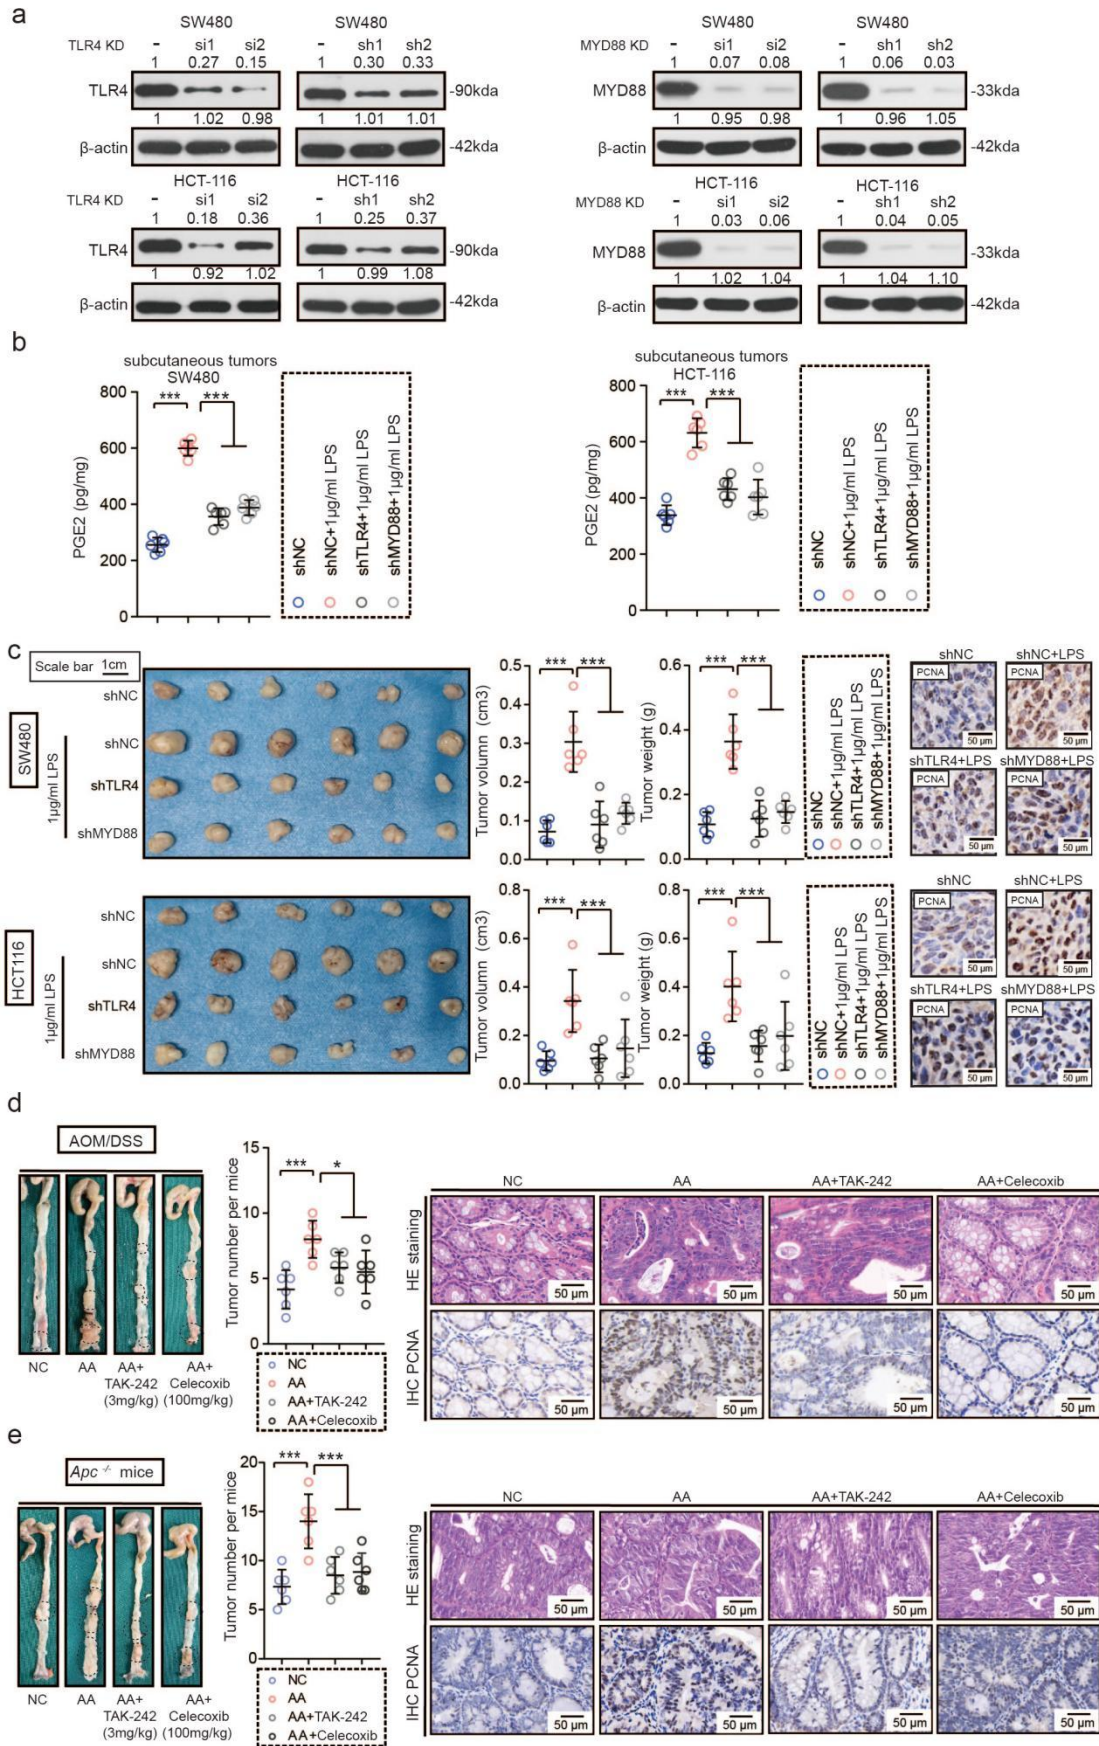

283

284 **Supplementary Fig 8. Inhibition of TLR4/MYD88 pathway**

285 **impaired LPS-induced cell proliferation of CRC tumor.** a. *TLR4*  
286 and *MYD88* knockdown in SW480 and HCT116 cells by siRNAs  
287 and shRNAs. The efficiency of *TLR4* and *MYD88* knockdown was  
288 detected by western blot (n=3 biological replicates). b. PGE2 levels  
289 in the subcutaneous tumors injected with sh*TLR4*, sh*MYD88* and  
290 shNC SW480 or HCT-116 cells, under activation of 1μg/ml of LPS.  
291 \*\*\**p*<0.001. (n=6 samples per group, means ± s.d., two-tailed  
292 unpaired *t* test, n=3 technical replicates). c. Representative image of  
293 the subcutaneous tumors injected with sh*TLR4*, sh*MYD88* and shNC  
294 SW480 or HCT-116 cells, under activation of 1μg/ml of LPS by  
295 intratumoral injection (n=6 mice per group, means ± s.d., two-tailed  
296 unpaired *t* test). Tumor weight and volume (length\*width<sup>2</sup>/2) were  
297 calculated. \*\*\**p*<0.001. Representative images of PCNA expression  
298 in the subcutaneous tumors was showed. Scale bars, 50 μm. d.  
299 Representative image of AOM/DSS model with NC and AA feeding,  
300 treated by TLR4 inhibitor (TAK-242, 3mg/kg, intraperitoneal  
301 injection) and PTGS2 inhibitor (Celecoxib, 100mg/kg, oral  
302 treatment) (n=6 mice per group, means ± s.d., two-tailed unpaired *t*  
303 test). Black circles showed the tumor region. \**p*=0.036, \*\*\**p*<0.001.  
304 Representative images of PCNA expression in the tumors was  
305 showed. Scale bars, 50 μm. e. Representative image of the  
306 intestine-specific *Apc*<sup>-/-</sup> model with NC and AA feeding, treated by

307 TLR4 inhibitor (TAK-242, 3mg/kg, intraperitoneal injection) and  
308 PTGS2 inhibitor (Celecoxib, 100mg/kg, oral treatment). Black  
309 circles showed the tumor region (n=6 mice per group, means  $\pm$  s.d.,  
310 two-tailed unpaired *t* test). \*\*\* $p$ <0.001. Representative images of  
311 PCNA expression in the tumors was showed. Scale bars, 50  $\mu$ m.  
312 (n=6 mice per group). Source data are provided in the Source Data  
313 file.

314

315

316

317

318

319

320

321

322

323

324

325

326

327

328

329

330

331

332

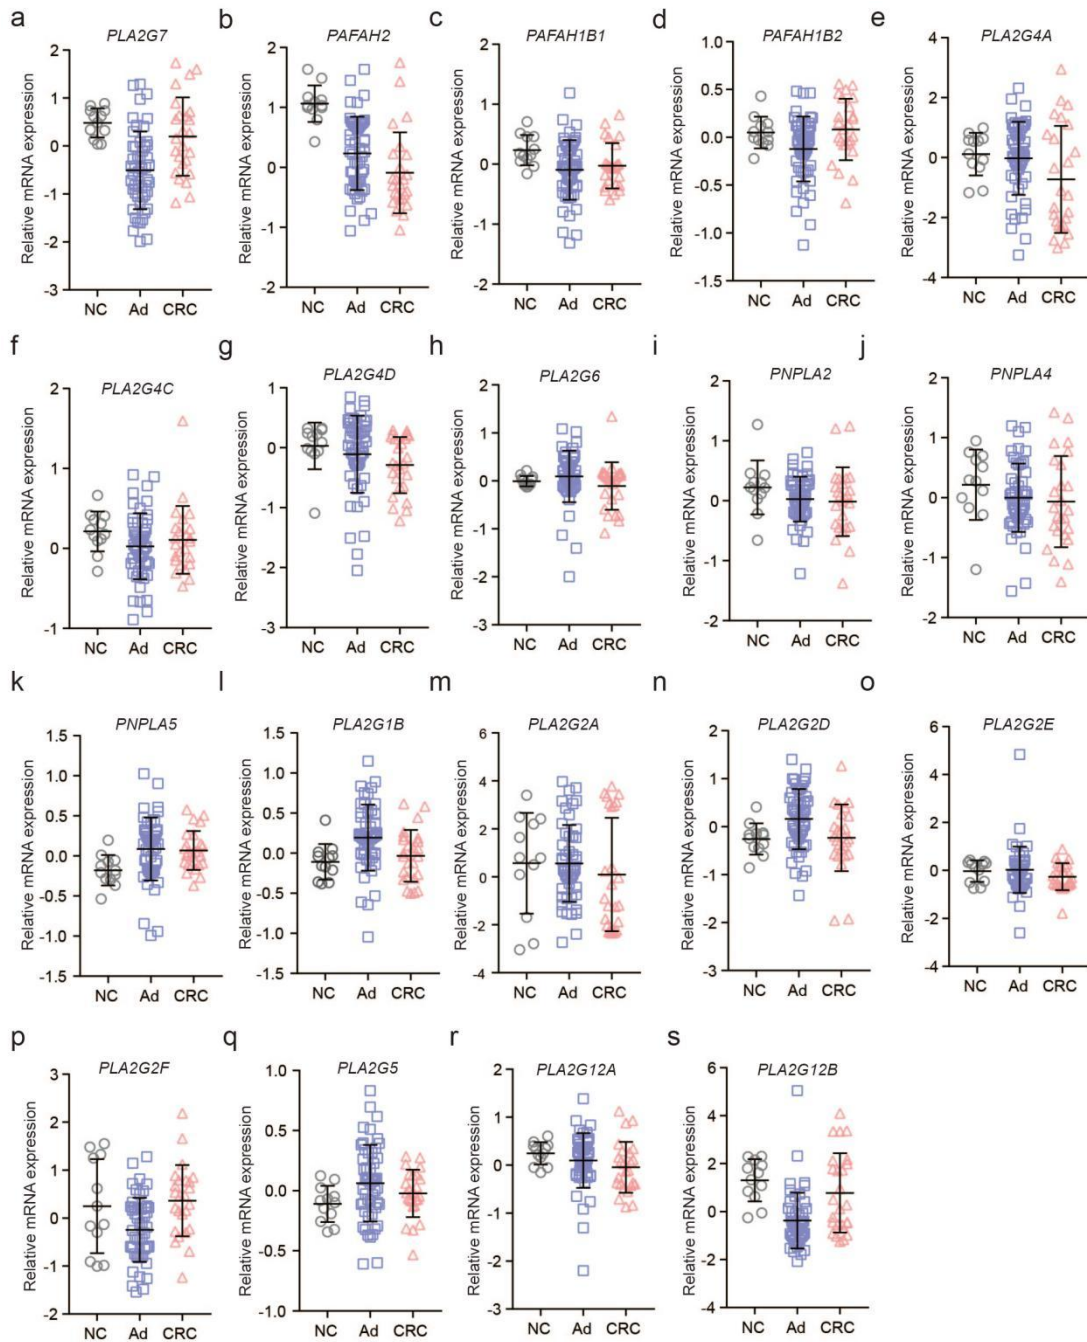

333 **Supplementary Figure 9. The mRNA expression of PLA enzymes**

334 **in GSE41657. (a-s) The mRNA expression of *PLA2G7*, *PAFAH2*,**

335 *PFAH1B1*, *PFAH1B2*, *PLA2G4A*, *PLA2G4C*, *PLA2G4D*, *PLA2G6*,  
 336 *PNPLA2*, *PNPLA4*, *PNPLA5*, *PLA2G1B*, *PLA2G2A*, *PLA2G2D*,  
 337 *PLA2G2E*, *PLA2G2F*, *PLA2G5*, *PLA2G12A*, *PLA2G12B* in NC  
 338 (n=13 samples), Ad (n=50 samples) and CRC (n=25 samples)  
 339 samples. Measurement data were presented as the mean  $\pm$  s.d..

340

341 **Supplementary Table 1 Interference sequence and primers of**  
 342 **target genes used in this study.**

|                   |       | Sequence                        |
|-------------------|-------|---------------------------------|
| <i>TLR4</i> siNC  | Sense | 5'-AGGACAGGGUUCUCCCUUCCUCUAU-3' |
| <i>TLR4</i> si1   | Sense | 5'-AGGCUGACAUUGGCCUCCUCCUAU-3'  |
| <i>TLR4</i> si2   | Sense | 5'-CCACACCCAAUUGCUUCAUGCUUAA-3' |
| <i>MYD88</i> siNC | Sense | 5'-UUCUCCGAACGUGUCACGUTT-3'     |
| <i>MYD88</i> si1  | Sense | 5'-GCCTATCGCTGTTCTTGAA-3'       |
| <i>MYD88</i> si2  | Sense | 5'-GACTGATTCTTAAATA-3'          |
| <i>PTGES</i> siNC | Sense | 5'-UCGUCAUUUCCGUCUCUGGCCUAA-3'  |
| <i>PTGES</i> si1  | Sense | 5'-GGGACTTGATGTTCCCTCCAGATTG-3' |
| <i>PTGES</i> si2  | Sense | 5'-CCUUGCCGUUGGCUUUGGAUGUCUU-3' |
| <i>PTGS2</i> siNC | Sense | 5'-GAGUAUGUGGUCAUACCGAAUUUCA-3' |
| <i>PTGS2</i> si1  | Sense | 5'-GAGUUAUGUGUUGACAUCAGAUCA-3'  |
| <i>PTGS2</i> si2  | Sense | 5'-GAAGCCUUCUCUAACCUCUCCUAUU-3' |
| <i>FADS1</i> shNC | Sense | 5'-UCUACUCAUUCGUGUCACCUCUAUU-3' |
| <i>FADS1</i> sh1  | Sense | 5'-GGGCCTTGTGAAGAAGTATA-3'      |
| <i>FADS1</i> sh2  | Sense | 5'-GCAAAGACCCAGACATCAACA-3'     |
| <i>TLR4</i> shNC  | Sense | 5'-AAGACUACUGUUUCGACUUCUCUAA-3' |
| <i>TLR4</i> sh1   | Sense | 5'-CACGGCATCTTTACTGGCTTAGTCA-3' |
| <i>TLR4</i> sh2   | Sense | 5'-CATCTTCACAGAGCTGACTAACTTA-3' |
| <i>MYD88</i> shNC | Sense | 5'-TTCTCCGAACGTGTCACGTTT-3'     |
| <i>MYD88</i> sh1  | Sense | 5'-GCACATACAGACTCACATACA-3'     |
| <i>MYD88</i> sh2  | Sense | 5'-GACATGTACTCTCACACACAC-3'     |
| <i>PTGES</i> shNC | Sense | 5'-GGUUUCGACUAUUUCAACGGCCUUU-3' |
| <i>PTGES</i> sh1  | Sense | 5'-GGAACGACATGGAGACCATCT-3'     |
| <i>PTGES</i> sh2  | Sense | 5'-GGGCTTCGTCTACTCCTTTCT-3'     |
| <i>PTGS2</i> shNC | Sense | 5'-AATTCTCCGAACGTGTCACGT-3'     |
| <i>PTGS2</i> sh1  | Sense | 5'-GCAACACTTGAGTGGCTATCA-3'     |

|                  |                |                                 |
|------------------|----------------|---------------------------------|
| <i>PTGS2 sh2</i> | <b>Sense</b>   | 5'- GCTTTATGCTGAAGCCCTATG-3'    |
| <i>shNC</i>      | <b>Sense</b>   | 5'-CACAGAATAGAACGCAATTCCAGAT-3' |
| <i>ShFads1</i>   | <b>Sense</b>   | 5'-GCACATGCCATACAACCATCA-3'     |
| <i>FADS1</i>     | <b>Forward</b> | 5'-CCAACTGCTTCCGCAAAGAC-3'      |
|                  | <b>Reverse</b> | 5'-GCTGGTGGTTGTACGGCATA-3'      |
| <i>18S</i>       | <b>Forward</b> | 5'-TGCGAGTACTCAACACCAACA-3'     |
|                  | <b>Reverse</b> | 5'-GCATATCTTCGGCCCACA-3'        |
| <i>TLR4</i>      | <b>Forward</b> | 5'-AGACCTGTCCCTGAACCCTAT-3'     |
|                  | <b>Reverse</b> | 5'-CGATGGACTTCTAAACCAGCCA-3'    |
| <i>MYD88</i>     | <b>Forward</b> | 5'-GGCTGCTCTCAACATGCGA-3'       |
|                  | <b>Reverse</b> | 5'-CTGTGTCCGCACGTTCAAGA-3'      |
| <i>PTGES</i>     | <b>Forward</b> | 5'-TCCTAACCCCTATTGTCGCCTG-3'    |
|                  | <b>Reverse</b> | 5'-CGCTTCCCAGAGGATCTGC-3'       |
| <i>PTGS2</i>     | <b>Forward</b> | 5'-TAAGTGCGATTGTACCCGGAC-3'     |
|                  | <b>Reverse</b> | 5'-TTTGTAGCCATAGTCAGCATTGT-3'   |

343

344

345 **Supplementary Table 2 Gender of human research participants**

| Case | Gender | Case | Gender | Case | Gender | Case | Gender | Case | Gender |
|------|--------|------|--------|------|--------|------|--------|------|--------|
| 1    | Male   | 101  | Female | 201  | Male   | 301  | Male   | 1    | Male   |
| 2    | Female | 102  | Female | 202  | Male   | 302  | Male   | 2    | Male   |
| 3    | Male   | 103  | Male   | 203  | Female | 303  | Male   | 3    | Female |
| 4    | Male   | 104  | Female | 204  | Female | 304  | Female | 4    | Male   |
| 5    | Female | 105  | Male   | 205  | Male   | 305  | Male   | 5    | Male   |
| 6    | Female | 106  | Female | 206  | Male   | 306  | Male   | 6    | Female |
| 7    | Male   | 107  | Female | 207  | Female | 307  | Male   | 7    | Male   |
| 8    | Female | 108  | Male   | 208  | Male   | 308  | Male   | 8    | Female |
| 9    | Female | 109  | Male   | 209  | Female | 309  | Female | 9    | Male   |
| 10   | Male   | 110  | Female | 210  | Female | 310  | Female | 10   | Female |
| 11   | Male   | 111  | Female | 211  | Male   | 311  | Male   | 11   | Male   |
| 12   | Female | 112  | Male   | 212  | Male   | 312  | Male   | 12   | Female |
| 13   | Male   | 113  | Male   | 213  | Male   | 313  | Female | 13   | Female |
| 14   | Male   | 114  | Male   | 214  | Female | 314  | Female | 14   | Male   |
| 15   | Male   | 115  | Female | 215  | Female | 315  | Male   | 15   | Male   |
| 16   | Male   | 116  | Male   | 216  | Male   | 316  | Female |      |        |
| 17   | Male   | 117  | Male   | 217  | Male   | 317  | Male   |      |        |
| 18   | Male   | 118  | Male   | 218  | Male   | 318  | Female |      |        |
| 19   | Male   | 119  | Male   | 219  | Male   | 319  | Male   |      |        |
| 20   | Male   | 120  | Male   | 220  | Male   | 320  | Male   |      |        |
| 21   | Female | 121  | Male   | 221  | Male   | 321  | Female |      |        |
| 22   | Male   | 122  | Male   | 222  | Male   | 322  | Male   |      |        |

|    |        |     |        |     |        |     |        |
|----|--------|-----|--------|-----|--------|-----|--------|
| 23 | Male   | 123 | Male   | 223 | Female | 323 | Male   |
| 24 | Male   | 124 | Female | 224 | Male   | 324 | Male   |
| 25 | Male   | 125 | Male   | 225 | Female | 325 | Female |
| 26 | Male   | 126 | Male   | 226 | Male   | 326 | Female |
| 27 | Female | 127 | Male   | 227 | Male   | 327 | Female |
| 28 | Female | 128 | Male   | 228 | Male   | 328 | Female |
| 29 | Female | 129 | Male   | 229 | Male   | 329 | Female |
| 30 | Male   | 130 | Male   | 230 | Male   | 330 | Female |
| 31 | Male   | 131 | Male   | 231 | Male   | 331 | Male   |
| 32 | Male   | 132 | Female | 232 | Male   | 332 | Male   |
| 33 | Female | 133 | Female | 233 | Female | 333 | Female |
| 34 | Male   | 134 | Male   | 234 | Male   | 334 | Female |
| 35 | Male   | 135 | Male   | 235 | Male   | 335 | Male   |
| 36 | Male   | 136 | Female | 236 | Female | 336 | Male   |
| 37 | Male   | 137 | Female | 237 | Female | 337 | Male   |
| 38 | Female | 138 | Female | 238 | Male   | 338 | Male   |
| 39 | Male   | 139 | Male   | 239 | Male   | 339 | Male   |
| 40 | Female | 140 | Female | 240 | Female | 340 | Male   |
| 41 | Female | 141 | Female | 241 | Male   | 341 | Male   |
| 42 | Male   | 142 | Male   | 242 | Female | 342 | Female |
| 43 | Male   | 143 | Female | 243 | Male   | 343 | Male   |
| 44 | Male   | 144 | Female | 244 | Female | 344 | Male   |
| 45 | Female | 145 | Female | 245 | Male   | 345 | Male   |
| 46 | Female | 146 | Male   | 246 | Male   | 346 | Female |
| 47 | Female | 147 | Male   | 247 | Male   | 347 | Male   |
| 48 | Male   | 148 | Male   | 248 | Female | 348 | Male   |
| 49 | Male   | 149 | Female | 249 | Female | 349 | Male   |
| 50 | Female | 150 | Male   | 250 | Male   | 350 | Male   |
| 51 | Female | 151 | Male   | 251 | Male   | 351 | Female |
| 52 | Female | 152 | Female | 252 | Male   | 352 | Male   |
| 53 | Male   | 153 | Male   | 253 | Male   | 353 | Male   |
| 54 | Female | 154 | Male   | 254 | Male   | 354 | Female |
| 55 | Female | 155 | Male   | 255 | Female | 355 | Female |
| 56 | Female | 156 | Female | 256 | Male   | 356 | Female |
| 57 | Male   | 157 | Female | 257 | Male   | 357 | Male   |
| 58 | Male   | 158 | Female | 258 | Female | 358 | Male   |
| 59 | Male   | 159 | Female | 259 | Male   | 359 | Female |
| 60 | Female | 160 | Female | 260 | Male   | 360 | Male   |
| 61 | Male   | 161 | Male   | 261 | Male   | 361 | Male   |
| 62 | Female | 162 | Female | 262 | Male   | 362 | Male   |
| 63 | Female | 163 | Female | 263 | Male   | 363 | Female |
| 64 | Male   | 164 | Male   | 264 | Male   | 364 | Female |
| 65 | Female | 165 | Female | 265 | Female | 365 | Male   |
| 66 | Female | 166 | Male   | 266 | Male   | 366 | Female |

|     |        |     |        |     |        |     |        |
|-----|--------|-----|--------|-----|--------|-----|--------|
| 67  | Male   | 167 | Male   | 267 | Female | 367 | Male   |
| 68  | Male   | 168 | Female | 268 | Female | 368 | Female |
| 69  | Female | 169 | Male   | 269 | Male   | 369 | Male   |
| 70  | Male   | 170 | Male   | 270 | Female | 370 | Female |
| 71  | Female | 171 | Male   | 271 | Female | 371 | Male   |
| 72  | Female | 172 | Female | 272 | Male   | 372 | Female |
| 73  | Female | 173 | Female | 273 | Male   | 373 | Female |
| 74  | Female | 174 | Male   | 274 | Male   | 374 | Female |
| 75  | Female | 175 | Male   | 275 | Male   | 375 | Female |
| 76  | Female | 176 | Female | 276 | Female | 376 | Female |
| 77  | Male   | 177 | Male   | 277 | Female | 377 | Male   |
| 78  | Male   | 178 | Male   | 278 | Male   | 378 | Male   |
| 79  | Female | 179 | Male   | 279 | Male   | 379 | Female |
| 80  | Male   | 180 | Female | 280 | Female | 380 | Male   |
| 81  | Male   | 181 | Female | 281 | Male   | 381 | Female |
| 82  | Female | 182 | Female | 282 | Female | 382 | Female |
| 83  | Male   | 183 | Female | 283 | Male   | 383 | Male   |
| 84  | Female | 184 | Female | 284 | Female | 384 | Male   |
| 85  | Female | 185 | Female | 285 | Female | 385 | Female |
| 86  | Male   | 186 | Female | 286 | Female | 386 | Male   |
| 87  | Male   | 187 | Male   | 287 | Female | 387 | Male   |
| 88  | Male   | 188 | Male   | 288 | Male   | 388 | Male   |
| 89  | Male   | 189 | Male   | 289 | Male   | 389 | Female |
| 90  | Male   | 190 | Male   | 290 | Female | 390 | Male   |
| 91  | Male   | 191 | Male   | 291 | Male   | 391 | Male   |
| 92  | Male   | 192 | Female | 292 | Female | 392 | Male   |
| 93  | Male   | 193 | Male   | 293 | Female |     |        |
| 94  | Male   | 194 | Female | 294 | Female |     |        |
| 95  | Male   | 195 | Male   | 295 | Female |     |        |
| 96  | Male   | 196 | Male   | 296 | Male   |     |        |
| 97  | Male   | 197 | Male   | 297 | Male   |     |        |
| 98  | Female | 198 | Male   | 298 | Male   |     |        |
| 99  | Female | 199 | Male   | 299 | Female |     |        |
| 100 | Male   | 200 | Male   | 300 | Female |     |        |

---

346

347 **Supplementary Table 3 Feed formula for AA feeding**

|             | Control | 1.5% AA |
|-------------|---------|---------|
| Casein      | 205     | 205     |
| Corn starch | 368     | 368     |
| Dextrin     | 135     | 135     |
| Sucrose     | 102     | 102     |
| Soybean oil | 72      | 72      |

|                  |      |      |
|------------------|------|------|
| Cellulose        | 51   | 51   |
| Minerals         | 36   | 36   |
| Vitamin          | 10   | 10   |
| L-cystine        | 3    | 3    |
| Choline tartrate | 3    | 3    |
| TBHQ             | 0.01 | 0.01 |
| Cocoa butter     | 15   | 0    |
| Arachidonic acid | 0    | 15   |
| Total(g)         | 1000 | 1000 |

348

## 349 **Supplementary materials and methods**

### 350 **Patients and samples**

351 A total of 392 paraffin sections of CRC tissues and adjacent paired  
352 non-cancerous tissues were collected from the Department of  
353 Gastrointestinal Surgery, Renji Hospital, School of Medicine, Shanghai  
354 Jiao Tong University. These sections were used to design a tissue  
355 microarray. All patients with CRC underwent surgery at the Department  
356 of Gastrointestinal Surgery, Renji Hospital, School of Medicine, Shanghai  
357 Jiao Tong University between January 2014 and January 2016. The  
358 matched CRC, adenoma, and non-cancerous tissues were collected from  
359 15 CRC cases and stored  $-80^{\circ}\text{C}$ . The gender of patients showed in  
360 Supplementary Table 2. The study was approved by the Research Ethics  
361 Committee of Renji Hospital (2018-064) and carried out under the ethical  
362 standards formulated in the Helsinki Declaration. Informed consent was  
363 provided by all patients.

364

### 365 **Cell culture**

366 SW480 (SCSP-5033), HCT116 (TCHu 99), SW620 (TCHu101), HT29  
367 (SCSP-5032), LoVo (TCHu 82), RKO (TCHu116) cells (human CRC cell  
368 lines) were obtained from the Cell Bank of the Chinese Academy of  
369 Sciences (Shanghai, China), and NCM460 cells (human intestinal  
370 epithelial cell line, JZ-006820) were obtained from the Juzhou  
371 Biotechnology Co., LTD (Anhui, China) , which all performed  
372 genotyping of human cancer cell lines by short tandem repeat (STR)  
373 profiling and had no cross-contamination. All cell lines were cultured in  
374 Dulbecco's modified Eagle's medium supplemented with 10% fetal  
375 bovine serum (10099, Gibco) and 1% penicillin and streptomycin at 37°C  
376 with 5% CO<sub>2</sub> in a humidified incubator. To further confirm the role of  
377 AA, fatty acid free fetal bovine serum (10%) was used to cell culture  
378 (Fetal Bovine Serum (Australia), Lipid Depleted, S1370L, BIOAGRIO).

379

### 380 **Lentivirus and siRNA transfection**

381 An appropriate amount of CRC cells were added and cultured in 6-well  
382 plates, until the cells grew to about 60% in each well. siRNA and shRNA  
383 transfection were performed. siRNA transfection: two sterile 1.5ml EP  
384 tubes were taken, one was supplemented with 250ul Opti-MEM medium  
385 (31985070, Gibco™) and 5ul Lipofectamine™ RNAiMAX Transfection  
386 Reagent (13778057, Thermo Fisher), and the other was supplemented  
387 with 250ul Opti-MEM medium and 5ul siRNA fragment. Mix well and

388 stand for 5 minutes, respectively. Then mix the two tubes and stand for 20  
389 minutes. The mixed solution was added to each well of the 6-well plate,  
390 and 1ml 10% FBS of DMEM medium without 1% penicillin and  
391 streptomycin was added and cultured for 12 hours, then the medium was  
392 changed to 10% FBS of DMEM medium with 1% penicillin and  
393 streptomycin. After 48 hours, the interference efficiency was detected by  
394 q-PCR and western blot. siNC used as a negative control. Lentivirus  
395 transfection: the lentivirus with shRNAs ( $10^8$  TU/ml) was constructed  
396 and obtained from GenePharma (Shanghai GenePharma Co., Ltd.,  
397 Shanghai, China). A sterile 1.5ml EP tube was taken and added with  
398 100ul lentivirus liquid, 1.5 ml Opti-MEM and  $2\mu\text{g/ml}$  polybrene. Mix  
399 well and add to to each well of the 6-well plate. After 24h, the medium  
400 was changed to 10% FBS of DMEM medium with 1% penicillin and  
401 streptomycin. When the transfected CRC cells covered the entire 6-well  
402 plate, the puromycin was added to screen the successfully transfected  
403 cells, the screening cycle was 2 weeks. The interference efficiency was  
404 detected by q-PCR and western blot. shNC used as a negative control.

405

#### 406 **Reagents**

407 Azoxymethane was purchased from Sigma-Aldrich (A5486). Dextran

408 Sulfate Sodium was purchased from MP Biomedicals (9011-18-1).

409 Arachidonic acid was purchased from Sigma-Aldrich (A3611).

410 Lipopolysaccharide was purchased from Sigma-Aldrich (L4391). TLR4  
411 inhibitor, TAK-242, and PTGS2 inhibitor, celecoxib, were purchased  
412 from Selleck (S7455 and SC58635), TAK-242 was intraperitoneal  
413 injection with 3mg/kg and celecoxib was suspended in 0.5%  
414 methylcellulose and orally treated at 100mg/kg to the tumor-bearing mice  
415 every day. FADS1 inhibitor, D5D-IN-326  
416 (2-(2,2,3,3,3-pentafluoropropoxy)-3-[4-(2,2,2-trifluoroethoxy)phenyl]-  
417 5,7-dihydro-3H-pyrrolo[2,3-d]pyrimidine-4,6-dione), was purchased  
418 from MedChemExpress (HY-117427) and orally treated at 2mg/kg for 2  
419 weeks. Proteinase K (G1205), DAPI (G1012) and EdU assay kit (G1501)  
420 was purchased from Servicebio.

421

## 422 **Animal experiments**

423 **AOM/DSS-induced CRC:** Male C57BL/6J mice (4 weeks of age) were  
424 purchased from the Animal Room, East China Normal University  
425 (Shanghai, China) and raised in an SPF animal room. After two weeks of  
426 adaptive feeding, a single intraperitoneal injection of azoxymethane  
427 (AOM, 10 mg/kg), 2% dextran sodium sulfate (DSS) (1 week) and  
428 normal water intake (1 week) for 3 cycles were used to induce CRC.  
429 Tumor tissues were collected and a portion stored at  $-80^{\circ}\text{C}$ . The  
430 remaining tumor tissues were embedded in paraffin for histological  
431 examination. At antibiotic treatment groups, mice were pretreated with

432 quadruple antibiotics for two weeks, including ampicillin (0.2 g/L),  
433 vancomycin (0.1 g/L), neomycin (0.2 g/L), and metronidazole (0.2 g/L)  
434 to eliminate intestinal flora before AOM/DSS treatment. For selective  
435 antibiotic treatment experiment, aztreonam (0.2 g/L) was used to  
436 eliminate Gram-negative bacteria and vancomycin (0.1 g/L) was used to  
437 eliminate Gram-positive bacteria for two weeks before AOM/DSS  
438 treatment.

439

440 **Spontaneous CRC model** : *Apc*<sup>flox/flox</sup> mice and  
441 *Lgr5-EGFP-IRES-CreERT2* mice were obtained from the Animal Room,  
442 East China Normal University (Shanghai, China). All the above mice  
443 were on the C57BL/6 genetic background. *Apc*<sup>flox/flox</sup> mice were crossed  
444 with *Lgr5-EGFP-IRES-CreERT2* mice for ablation of *Apc* expression in  
445 *Lgr5*<sup>+</sup> cells was deleted with four consecutive daily doses of Tamoxifen  
446 (50 mg/kg). RNA was identified five days after the initial dose by  
447 quantitative reverse transcription PCR (qRT-PCR). 20-24 weeks intestinal  
448 specific *Apc*<sup>-/-</sup> mice were used in this article. Antibiotic treatment was  
449 consistent with AOM/DSS mice.

450

451 **Mice feeding:** AIN-93G diet was used for the control diet (NC feeding),  
452 diet enriched with AA-FFA 1.5% for AA feeding, and 2 diets were  
453 isocaloric. In order to prevent AA from being oxidized, the feed is

454 vacuum-packed (50g/per pack), stored at low temperature (4°C) and  
455 avoided repeated use. All feeds are daily provided. The nutritional  
456 composition of the mice feed are shown in Supplementary Table 3.

457 **Table S2 Feed formula for mice**

|                  | Control | 1.5% AA |
|------------------|---------|---------|
| Casein           | 205     | 205     |
| Corn starch      | 368     | 368     |
| Dextrin          | 135     | 135     |
| Sucrose          | 102     | 102     |
| Soybean oil      | 72      | 72      |
| Cellulose        | 51      | 51      |
| Minerals         | 36      | 36      |
| Vitamin          | 10      | 10      |
| L-cystine        | 3       | 3       |
| Choline tartrate | 3       | 3       |
| TBHQ             | 0.01    | 0.01    |
| Cocoa butter     | 15      | 0       |
| Arachidonic acid | 0       | 15      |
| Total(g)         | 1000    | 1000    |

458

459

460 **Fecal collection and fecal transplant:** Male C57BL/6J mice (4 weeks of  
461 age) were purchased and raised in an SPF animal room. After two weeks  
462 of adaptive feeding, the mice were randomly divided into two groups,  
463 including AA feeding and NC feeding groups. After 12 weeks, mouse  
464 feces of each group were collected by sterile instruments for gut  
465 microbiota analysis and fecal transplant. AOM/DSS and *Apc*<sup>-/-</sup> Mice that  
466 received fecal transplants were pretreated with quadruple antibiotics for  
467 two weeks, including ampicillin (0.2 g/L), vancomycin (0.1 g/L),  
468 neomycin (0.2 g/L), and metronidazole (0.2 g/L) to eliminate intestinal

469 flora. Mice were divided into stool-AA (stool from AA feeding) and  
470 stool-NC (stool from normal feeding) groups and administered 200ul  
471 stool suspension by gavage (twice a week). One gram of mixed stool was  
472 then suspended in 5 mL PBS.

473

474 **Xenograft model:** Athymic male null mice (6 weeks) were used for the  
475 subcutaneous xenograft model, purchased from the Animal Room, East  
476 China Normal University (Shanghai, China). All the above mice were on  
477 the BALB/C genetic background. Five million SW480 or HCT116 cells  
478 were injected into left anterior flank of each null mouse. Tumor diameters  
479 were monitored with callipers every week of mice for 4 weeks. After 4  
480 weeks, all null mice were sacrificed and xenograft tumors excised. Part of  
481 the tissues were fixed in 4% paraformaldehyde for histological analysis.  
482 The other tissues were stored at  $-80^{\circ}$  C. Tumor volume and weight were  
483 recorded. Tumor volume was calculated with  $\text{length} \times \text{width}^2 / 2$ . The  
484 reagent treatments (intratumor injection) were as follows: AA (2mg/L),  
485 LPS (1  $\mu\text{g/ml}$ ), PGE2 (1mg/L). 100ul reagents were injected into  
486 subcutaneous xenograft once a week.

487 **Orthotopic model:** Nude mice (6 weeks, male, BALB/C) were  
488 anesthetized with 0.5% pentobarbital. After opening the abdominal cavity,  
489  $5 \times 10^6$  SW480<sup>Luc</sup> or HCT116<sup>Luc</sup> cells were injected into the ileocecum.  
490 Mice bearing orthotopic tumor were intraperitoneally injected with

491 150mg/200ul D-luciferin, anaesthetized with 2.5% vapourized inhaled  
492 isoflurane, placed into an IVIS Spectrum imaging system (Perkin Elmer  
493 Lifelimage 4.5.5) (Caliper Life Sciences, Waltham, MA). Computed  
494 tomography (CT) was then performed to merge with firefly  
495 bioluminescence signals. For organ reconstruction, CT images were  
496 placed combined with the autoreconstructed intestine and colon at an  
497 opacity of 20%. The normalization and quantification of firefly  
498 bioluminescence signals were performed according to the surrounding  
499 area of the red cube. After 4 weeks, mice were sacrificed and tumor  
500 tissues were excised. Part of the tissues were fixed in 4%  
501 paraformaldehyde for histological analysis. The other tissues were stored  
502 at  $-80^{\circ}\text{C}$ . At antibiotic treatment groups, mice were pretreated with  
503 quadruple antibiotics for two weeks, including ampicillin (0.2 g/L),  
504 vancomycin (0.1 g/L), neomycin (0.2 g/L), and metronidazole (0.2 g/L)  
505 to eliminate intestinal flora. For selective antibiotic treatment experiment,  
506 aztreonam (0.2 g/L) was used to eliminate Gram-negative bacteria and  
507 vancomycin (0.1 g/L) was used to eliminate Gram-positive bacteria for  
508 two weeks in nude mice.

509

510 **Organoid model:** Intestinal tumor tissue was obtained from AOM/DSS  
511 mice. Tumor tissue was shredded on ice and digested with digestive  
512 liquid for 30min (digestion on a constant temperature culture shaker).

513 After terminating digestion, supernatant was removed by centrifugation at  
514 500g for 5min. After re-suspension by PBS, the supernatant was filtered  
515 through 70 $\mu$ m filter, remove supernatant after centrifugation, add 200ul  
516 organoid *in vitro* medium and fully mix. Add pre-thawed Matrigel matrix  
517 glue to equal ratio mixture, take 50ul of the mixture and add it to the  
518 middle part of the 24-well plate that has been preheated for 30min, put  
519 the 24-well plate into the incubator and stand for 20min, add 500ul  
520 organoid *in vitro* medium after the gel solidified, and add PBS to the  
521 other holes to ensure humidity. Organoid cells were transfected with a  
522 firefly luciferase before Lentivirus transfection to knockdown Fads1.  
523 Then a orthotopic model was conducted with Male C57BL/6J mice (4  
524 weeks of age). Mice were anesthetized with 0.5% pentobarbital. After  
525 opening the abdominal cavity,  $5 \times 10^6$  organoid cells were injected into  
526 the ileocecum. The orthotopic tumor was detected by IVIS Spectrum  
527 imaging system. After 4 weeks, mice were sacrificed and tumor tissues  
528 were excised. Part of the tissues were fixed in 4% paraformaldehyde for  
529 histological analysis. The other tissues were stored at  $-80^{\circ}\text{C}$ . Antibiotic  
530 treatments were consistent with orthotopic model.

531

### 532 **Liquid Chromatography Mass Spectrometry**

533 20 mg of tumor tissue was accurately weighed, 200 $\mu$ L 10% methanol  
534 (including BHT) was added, vortex mixing, ultrasound in ice bath for 30

535 min, arachidonic acid substances were extracted by HLB  $\mu$ elution system,  
536 200 $\mu$ L methanol activation, 200 $\mu$ L water equilibrium, sample loading.  
537 Rinse with 200  $\mu$ L water, then rinse with 200 $\mu$ L 10% methanol solution,  
538 50 $\mu$ L acetonitrile aqueous solution elution (acetonitrile: water: formic  
539 acid = 80:20:0.02; v/v/v). The samples were separated by Agilent 1290  
540 Infinity LC liquid chromatography system. A 5500 QTRAP mass  
541 spectrometer (AB SCIEX) was used for mass spectrometry analysis in  
542 negative ion mode. The peak area and retention time were extracted by  
543 Multiquant software. The standard arachidonic acid was used to correct  
544 the retention time and identify the metabolites.

545

#### 546 **RNA isolation and real-time quantitative polymerase chain reaction** 547 **(RT-qPCR)**

548 Real-time PCR was also used to detection of *Es. coli*, *En. faecalis* and  
549 *Lactobacillus*. *Es.coli* primers:F: 5'-CAATTTTCGTGTCCCCTTCG-3';  
550 R:5'-GTTAATGATAGTGTGTCGAAAC-3'.*En.faecalis*:F:5'-CCGAGTG  
551 CTTGCACTCAATTGG-3';R:5'-CTCTTATGCCATGCGGCATAAAC-3'.  
552 *Lactobacillus*:F:5'-CTGATGAAAGCCCTCG-3';R:5'-GAGCCTCAGCG  
553 TCAGTTG-3'. Actin as an internal control,  
554 F:5'-AAAAGCCACCCCACTTCTCT-3';R:5'-CTCAAGTTGGGGGAC  
555 AAAAA-3'. Primer for total bacteria  
556 detection:F:5'-GTGSTGCAYGGYTGTCGTCA-3';R:5'-ACGTCRTCCM

557 CACCTTCCTC-3', Relative expression of target genes was calculated by  
558 the  $2^{-\Delta\Delta Ct}$  method.

559

### 560 **Protein extraction and western blotting**

561 Total protein was extracted using radioimmunoprecipitation assay (RIPA)  
562 buffer supplemented with 1% protease and phosphatase inhibitors (78440,  
563 Thermo Fisher Scientific). Protein concentration was measured by  
564 bicinchoninic acid assay with a BCA Protein Assay Kit (Pierce  
565 Biotechnology) and keep a unified concentration. 5x SDS-PAGE Sample  
566 Loading Buffer (Beyotime; P0015) was added to protein samples and  
567 cooked in boiling water for 10min. Put 8-12% SDS-PAGE gel into the  
568 electrophoresis tank with enough electrophoresis solution. Add 20ul  
569 sample to each well and then perform protein electrophoresis (80V,  
570 30min and 120V, 60min). Then, the protein in the SDS-PAGE gel was  
571 transferred onto NC membranes. skimmed milk powder (Invitrogen)  
572 diluted in TBST (containing 1% Tween 20) at a concentration of 5% was  
573 used to block non-specific binding for 1-2 hours at room temperature.  
574 Primary antibodies were FADS1 (ab126706, Abcam, 1:000), TLR4  
575 (ab13556, Abcam, 1:1000),  $\beta$ -actin (ab8227, Abcam, 1:1000), MYD88  
576 (ab28763, Abcam, 1:1000), PTGES (ab233274, Abcam, 1:1000), PTGS2  
577 (ab179800, Abcam, 1:1000), proliferating cell nuclear antigen  
578 (10205-2-AP, Proteintech Group, Inc., 1:1000). Secondary antibodies,

579 horseradish peroxidase (HRP)-conjugated Affinipure Goat Anti-Rabbit  
580 IgG (H+L) (SA00001-2, 1:1000) and HRP-conjugated and Affinipure  
581 Goat Anti-Mouse IgG (H+L) (SA00004-1, 1:1000), were obtained from  
582 Proteintech Group, Inc. Overnight incubation with primary antibodies and  
583 incubation with secondary antibodies for 1h. All the bands were treated  
584 with Lumi Q ECL reagent solution kit (SB-WB012, Share-Bio) and  
585 detected by a ChemiDoc™ XRS+ system (BIO-RAD).

586

### 587 **Cell proliferation**

588 Cell proliferation was assessed using a Cell Counting Kit-8 (CCK8,  
589 Dojindo, Japan) following kit instructions. 3000/well CRC cells were  
590 seeded into 96-well plates. add PBS to the other holes to ensure humidity.  
591 Every 24h, the numbers of viable cells were measured using a microplate  
592 reader (BioTek, US) at an absorbance of 450 nm. The duration of testing  
593 was 4-5 days. At detection time point, 100 µl of diluted CCK-8 reagent in  
594 culture medium at a concentration of 10% (v/v) was added to every well  
595 and incubated with cells at 37°C for 1 hour. The data of CCK-8 was  
596 detected by using Thermo Scientific Multiskan FC. For each group, 5  
597 replicate wells were prepared and all experiments were replicated  
598 independently three times. The reagent treatment is as follows: AA  
599 (0.5mg/L, 1mg/L, 2mg/L), LPS (1 µg/ml), PGE2 (1mg/L).

600

601 **Colony formation analysis**

602 1000/well CRC cells were seeded into 6-well plates. The medium was  
603 changed every 3 days. After two weeks, cells were fixed in 4%  
604 paraformaldehyde for 30min and stained with 0.1% crystal violet solution,  
605 and the numbers of colonies (>50 cells) were counted under a microscope.  
606 Each experiment was carried out independently in triplicate. The reagent  
607 treatment is as follows: AA (0.5mg/L, 1mg/L, 2mg/L), LPS (1 µg/ml),  
608 PGE2 (1mg/L).

609

610 **EdU assay**

611 A Click-iT EdU kit (C10337, Thermo) was used following kit instructions.  
612 CRC cells were seeded into 12-well plates,  $2 \times 10^4$  cells/well. After 48h,  
613 cells were incubated with 50 µM EdU buffer, fixed with 4%  
614 formaldehyde, and permeabilized with 0.1% Triton X-100. EdU solution  
615 was added then add followed by staining of nuclei with Hoechst. Each  
616 experiment was carried out independently in triplicate. The reagent  
617 treatment is as follows: AA (0.5mg/L, 1mg/L, 2mg/L). Confocal  
618 microscopy images were taken using Leica SP8 LAS X.

619

620 **Elisa assay**

621 **Tumor tissue:** fresh tumor tissue was used, cut and weighed 100mg,  
622 frozen quickly with liquid nitrogen, ground the tissue manually, added

623 1ml PBS, and homogenized further with ultrasonic cell crusher.

624 **CRC cells:**  $10^7$  cells/sample were obtained and digested, 0.2ml PBS  
625 was added and repeated freeze-thaw with liquid nitrogen, and  
626 homogenized further with ultrasonic cell crusher. All the samples was  
627 centrifuged for 10 minutes (1000 g) and collected the supernatant.

628 **Interstitial fluid:** 300mg fresh tumor tissues were supported with  
629 triple-layered 10 $\mu$ m nylon mesh in the tube and centrifuged at 28 g for 5  
630 minutes to remove surface liquids of tissues, followed by centrifugation  
631 at 1000 g for another 10 minutes to collect interstitial fluids.

632 AA, EPA, and PGE2 were measured by detection kits (AA:NBP2-59872,  
633 Novus Biologicals; EPA:LM-11519-ES, Lianmai Biological Technology  
634 Co., Ltd.; PGE2: KGE004B, Novus Biologicals), respectively. In brief,  
635 according to instructions, detection procedure included adding standard  
636 samples, adding test samples, adding enzymes, incubation at 37°C for 60  
637 min, washing, coloring, stopping the reaction and measurement by using  
638 Thermo Scientific Multiskan FC.

639

#### 640 **Microarray data analysis**

641 GDS4382 and GSE41657 were searched and downloaded from the GEO  
642 database (<https://www.ncbi.nlm.nih.gov/geo/>). The COAD and READ  
643 dataset was searched and downloaded from the TCGA dataset. The  
644 analysis of differentially expressed genes (DEGs) used both fold change

645 and the student's *t*-tests. Fold change (FC)>2 and p-value <0.05 were  
646 deemed statistically significant. DEGs were used for KEGG pathway  
647 enrichment with a threshold for statistical significance of  $p < 0.05$ .

648

#### 649 **Statistical analysis**

650 All measurement data were were evaluated with two-way tudent's *t*-tests.  
651 Correlation of measurement data was analyzed by Pearson correlation.  
652 Relationship between the FADS1 expression with clinical variables in  
653 CRC patients was evaluated with different statistical methods. Data such  
654 as age and tumor size were evaluated with Student's *t*-tests. Categorical  
655 variables, such as sex, T stage, lymph node invasion, and distant  
656 metastasis, were analyzed via chi square or Fisher's exact test. Rank sum  
657 test was used for the analysis of two-way ordered categorical data.  
658 Survival curves were generated using the Kaplan–Meier method and  
659 analyzed with log-rank tests.
